# Supplementary material
Source: PubMed Central journal article supplement (PMC2634601)
Supplement: NIHMS79461-supplement-Suppl_Fig_1.pdf [file NIHMS79461-supplement-Suppl_Fig_1.pdf]

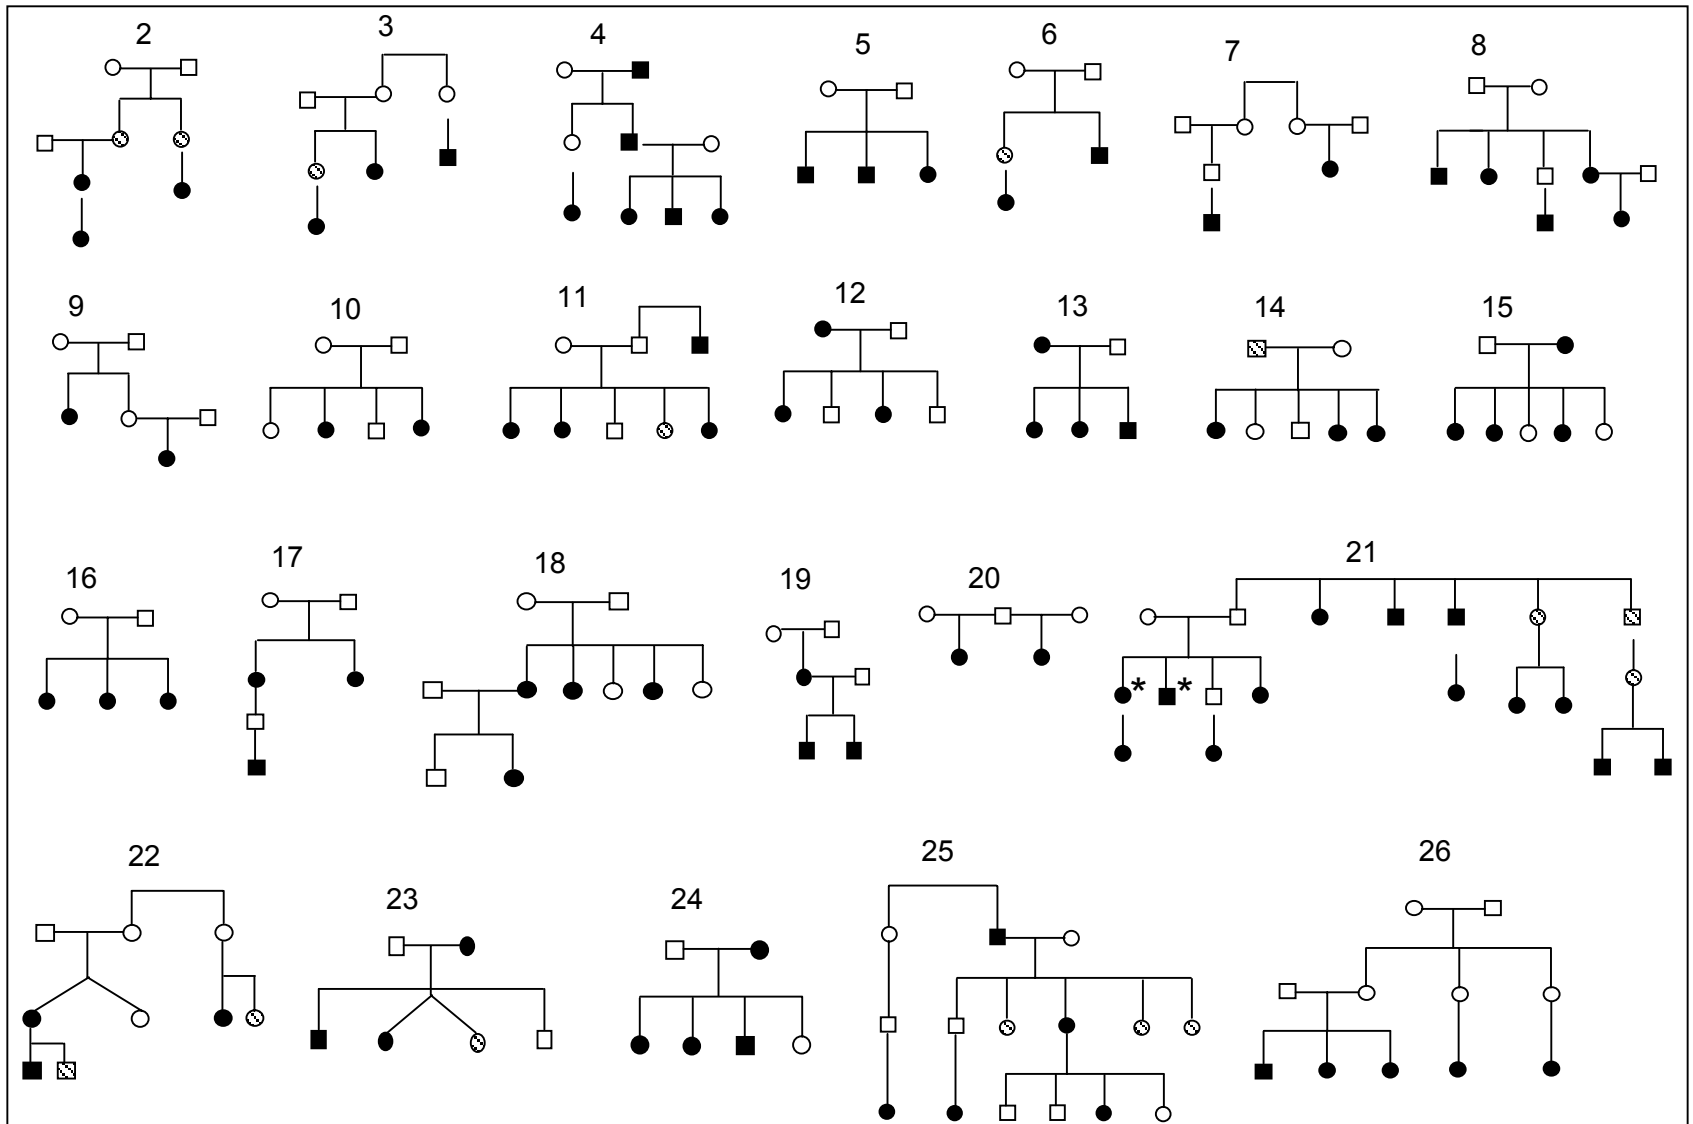

**Supplementary Figure 1. Simplified pedigrees of 25 PTC families.** Members affected with PTC are indicated by filled solid circles or squares. Hatched circles or squares denote those with benign thyroid disease. Open circles: unaffected. Two individuals with anaplastic thyroid cancer in family 21 are indicated with an asterisk (\*). Not all individuals shown here were included in all the linkage analyses described in the text.
