# Supplementary material
Source: PubMed Central journal article supplement (PMC2634601)
Supplement: NIHMS79461-supplement-Suppl_Fig_2.pdf [file NIHMS79461-supplement-Suppl_Fig_2.pdf]

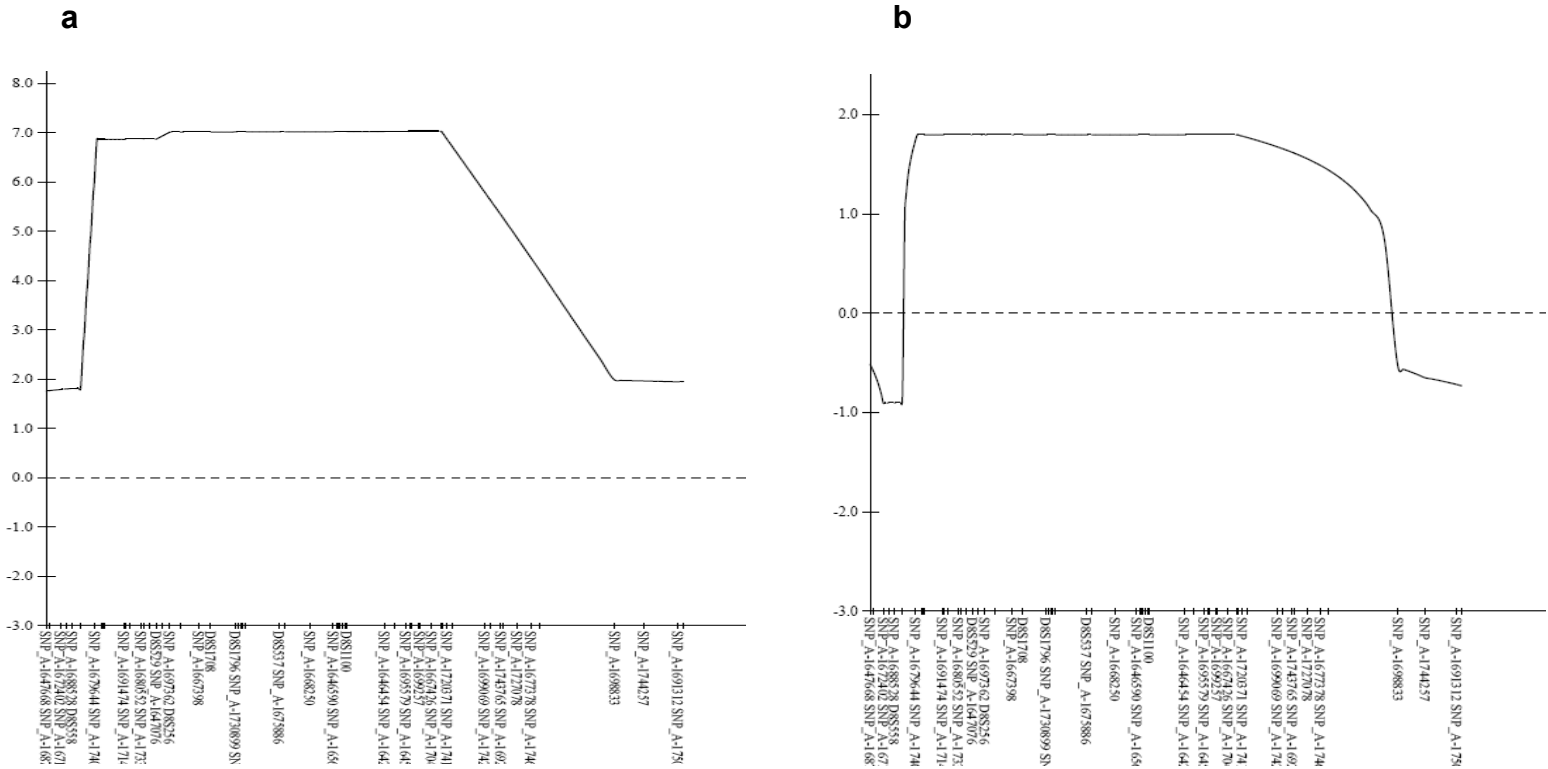

**Supplementary Figure 2.** NPL and LOD score plots in family #1. Multi-point nonparametric linkage analysis is shown with combined microsatellite markers and SNP markers considering only individuals with PTC and melanoma as “affected”. (a) NPL score plot, (b) LOD score plot.
