# Supplementary material
Source: PubMed Central journal article supplement (PMC2634601)
Supplement: NIHMS79461-supplement-Suppl_Tab_1.pdf [file NIHMS79461-supplement-Suppl_Tab_1.pdf]

## Supplementary Table 1. Sequences of primers

### I. Genotyping microsatellite markers

| Name    | Forward primer*       | Reverse primer          |
|---------|-----------------------|-------------------------|
| D8S558  | GGAACCACGCTTCGTTT     | GGGGCTTTAAGACCCAT       |
| TGms2   | taaccCAAattccccagtga  | gatgggtgcacCAAAatctc    |
| D8S1740 | AGCAGTCTGATCTGGCTCTC  | TCAATATGGGCTCAGCAAG     |
| D8S378  | TGTTCTGCACATGTATCCCA  | CATTCATTAGCCACAGGCC     |
| HC83REP | ACCCAGGGCTTCTCAGACTT  | GAAACCTGGCACTCAGCTTC    |
| D8S529  | TGCCCTAACCTGTCT       | TTAGCCTCCAATATGTCTCT    |
| D8S1796 | AGCCAGTGTTCATCC       | GTGCCATCTTCACAGCC       |
| D8S1746 | GCTTAGACTATGGGACCACAC | CAGTGAACATCAACCCTGC     |
| D8S537  | GAATTTTGGACTTGCCACC   | CGTATATGCCTCTGTAAGTTGGG |

\* Each of the forward primer has a M13 sequence tail (tgtaaaacgacggccagt) on its 5' end.

The PCR products were fluorescent-labeled with another round of PCR with a FAM labeled M13 oligo as forward primer and the same reverse primer.

FAM labeled M13 primer      FAM-tgtaaaacgacggccagt

|              |                       |                      |
|--------------|-----------------------|----------------------|
| D8S256_FAM** | GTTC AAGGGCTCAGGGTTCT | CTTCCACCTTTAGCCAAGGA |
| D8S1100_FAM  | CTGTGATTATTGCAAACCCC  | CCAGAGTACCTGGCATATGG |

\*\*The above 2 markers are pre-labeled primers from Invitrogen (Multi-Colored Fluorescent Human MapPairs® Markers).

### II. Real-time RT-PCR

|          |                    |                            |
|----------|--------------------|----------------------------|
| AK023948 | cagggcatggctgtgttt | gacattatcaagtaactagtgtgtca |
| GAPDH    | caccaactgcttagcacc | tcttctgggtggcagtgatg       |
