# Supplementary material
Source: PubMed Central journal article supplement (PMC2634601)
Supplement: NIHMS79461-supplement-Suppl_Tab_2.pdf [file NIHMS79461-supplement-Suppl_Tab_2.pdf]

**Supplementary Table 2. Clinical information of affected and key non-affected individuals of 10 families showing I**

| Kindred | Individual number <sup>a</sup> | Gender | Relationship to Proband          | Cancer & age at diagnosis                | AITD <sup>b</sup> |
|---------|--------------------------------|--------|----------------------------------|------------------------------------------|-------------------|
| 1       | 1                              | F      | Mother                           | PTC-49                                   | No                |
|         | 2                              | F      | Maternal aunt                    | Uveal melanoma-80; Cutaneous melanoma 70 | No                |
|         | 3                              | F      | Maternal aunt                    | PTC-82                                   | Yes               |
|         | 4                              | F      | Maternal aunt                    | None                                     | No                |
|         | 5                              | M      | Brother                          | PTC-48; Melanoma-47                      | No                |
|         | 6                              | F      | Proband                          | PTC, fv <sup>c</sup> -56                 | Yes               |
|         | 7                              | M      | Maternal 1st cousin              | PTC-57                                   | Yes               |
|         | 8                              | M      | Maternal 1st cousin              | PTC-51; Melanoma-30                      | No                |
|         | 9                              | F      | Maternal 1st cousin              | PTC-37                                   | No                |
|         | 10                             | F      | Maternal 1st cousin              | None                                     | Yes               |
|         | 11                             | F      | Maternal 1st cousin              | PTC-50                                   | U                 |
|         | 12                             | F      | Maternal 1st cousin              | None                                     | Yes               |
|         | 13                             | F      | Maternal 1st cousin              | None                                     | Yes               |
|         | 14                             | M      | Maternal 1st cousin              | None                                     | No                |
|         | 15                             | F      | Maternal 1st cousin              | None                                     | No                |
|         | 16                             | F      | Maternal 1st cousin              | None                                     | No                |
|         | 17                             | M      | Maternal 1st cousin              | None                                     | No                |
|         | 18                             | M      | Maternal 1st cousin once removed | Melanoma, synchronous-20                 | No                |
|         | NS <sup>d</sup>                | M      | Maternal uncle                   | Melanoma-78                              | U                 |
| 3       | 1                              | M      | Proband                          | PTC-60                                   | Yes               |
|         | 2                              | F      | Maternal 1st cousin              | PTC-22                                   | U                 |
|         | 3                              | F      | Maternal 1st cousin              | None                                     | Yes               |
|         | 4                              | F      | Maternal 1st cousin              | PTC-44                                   | U                 |
| 6       | 1                              | M      | Proband                          | PTC-37                                   | No                |
|         | 2                              | F      | Niece                            | PTC-17                                   | No                |
|         | 3                              | F      | Sister                           | None                                     | No                |
|         | 4                              | M      | Nephew                           | None                                     | No                |
|         | 5                              | F      | Maternal grandmother             | None                                     | No                |
| 8       | 1                              | M      | Proband                          | PTC-74                                   | No                |
|         | 2                              | F      | Sister                           | PTC-80                                   | No                |
|         | 3                              | F      | Niece                            | FTC and microPTC-51                      | No                |
|         | 4                              | F      | Sister                           | PTC, fv-69                               | Yes               |
|         | 5                              | M      | Paternal 1st cousin              | PTC-40                                   | No                |

|    |    |   |                      |                   |     |
|----|----|---|----------------------|-------------------|-----|
|    | 6  | F | Sister               | None              | Yes |
|    | 7  | F | Niece                | None              | Yes |
|    | 8  | F | Niece                | None              | No  |
|    | 9  | F | Niece                | None              | No  |
|    | 10 | F | Niece                | None              | No  |
| 9  | 1  | F | Proband              | PTC-38            | No  |
|    | 2  | F | Niece                | PTC-25            | No  |
|    | 3  | M | Nephew               | Melanoma          | No  |
|    | 4  | F | Sister               | None              | Yes |
| 10 | 1  | F | Proband              | PTC-48            | No  |
|    | 2  | F | Sister               | PTC-42            | Yes |
| 12 | 1  | F | Proband              | PTC-27            | No  |
|    | 2  | F | Daughter             | PTC-26            | Yes |
|    | 3  | F | Daughter             | PTC, fv-20        | No  |
| 17 | 1  | F | Proband              | PTC-55            | No  |
|    | 2  | M | Grandson             | PTC-26            | No  |
|    | 3  | F | Sister               | PTC-59            | U   |
|    | 4  | F | Niece                | Melanoma-30       | U   |
|    | 5  | F | Niece                | Melanoma-30       | U   |
|    | 6  | M | Nephew               | Melanoma-30       | U   |
|    | 7  | F | Sister               | None              | No  |
|    | 8  | F | Niece                | None              | Yes |
|    | 9  | F | Granddaughter        | None              | No  |
|    | 10 | F | Granddaughter        | None              | No  |
| 20 | 1  | F | Proband              | PTC-48            | Yes |
|    | 2  | F | Paternal half-sister | PTC-38            | Yes |
|    | 3  | F | Mother               | Melanoma-79       | No  |
|    | 4  | M | Father               | Melanoma-74       | No  |
|    | 5  | F | Paternal aunt        | Uveal melanoma-79 | U   |
| 24 | 1  | F | Proband              | PTC-39            | No  |
|    | 2  | F | Sister               | Mixed PTC/FTC-39  | Yes |
|    | 3  | M | Brother              | PTC-39            | No  |
|    | 4  | F | Mother               | Ovarian-58        | No  |

<sup>a</sup> For kindred 1, the individual number shown here corresponds to the individual number shown in Figure 1

<sup>b</sup> AITD = autoimmune thyroid diseases, including Hashimoto's thyroiditis and Graves' disease.

<sup>c</sup> PTC, fv = PTC, follicular variant

<sup>d</sup> Not shown in Figure 1

**inkage to the 8q24 locus**

|                                          |
|------------------------------------------|
| <b>Multinodular goiter (MNG)/nodules</b> |
| No                                       |
| Y-MNG                                    |
| Yes-MNG                                  |
| Yes-nodules                              |
| Yes-MNG                                  |
| No                                       |
| Yes-MNG                                  |
| No                                       |
| Y-MNG; Follicular adenoma                |
| No                                       |
| U                                        |
| Yes-Hurthle cell adenoma                 |
| Yes-MNG                                  |
| Yes-MNG                                  |
| Y-MNG                                    |
| Yes-nodules                              |
| Yes-nodules                              |
| No                                       |
| U                                        |
| Yes-MNG                                  |
| U                                        |
| No                                       |
| U                                        |
| Yes-follicular adenoma                   |
| No                                       |
| Yes-MNG                                  |
| Yes-Cold nodule                          |
| Yes-nodules                              |
| Yes-MNG                                  |
| No                                       |
| Yes- Follicular adenoma                  |
| No                                       |
| Yes-MNG                                  |

|                        |
|------------------------|
| Yes                    |
| Yes-MNG                |
| Yes-MNG                |
| Yes-MNG                |
| Yes-MNG                |
| No                     |
| No                     |
| No                     |
| No                     |
| Yes-MNG                |
| Yes-MNG                |
| Yes - MNG              |
| Yes-follicular adenoma |
| No                     |
| No                     |
| No                     |
| U                      |
| U                      |
| U                      |
| U                      |
| Yes-nodules            |
| No                     |
| Yes-nodules            |
| Yes-nodules            |
| Yes- MNG               |
| No                     |
| No                     |
| No                     |
| U                      |
| Yes-MNG                |
| No                     |
| Yes-MNG                |
| Yes-MNG                |
