# Supplementary material
Source: PubMed Central journal article supplement (PMC2634601)
Supplement: NIHMS79461-supplement-Suppl_Tab_3.pdf [file NIHMS79461-supplement-Suppl_Tab_3.pdf]

**Supplementary Table 3. Relative expression levels of four genes in the 8q24 region**

| <b>Genes</b>          | <b>TG</b>        | <b>AK023948</b>  | <b>AK023852</b>  | <b>SLA</b>         | <b>SLA</b>       |
|-----------------------|------------------|------------------|------------------|--------------------|------------------|
| <b>Affy probe ID*</b> | <b>203673_at</b> | <b>233111_at</b> | <b>214977_at</b> | <b>203760_s_at</b> | <b>203761_at</b> |
| PTC11N**              | 17990.6          | 5530.1           | 2832.3           | 85.6               | 176.5            |
| PTC11T                | 17866.2          | 4218.8           | 1670.2           | 109.4              | 208.5            |
| <b>Fold (T/N)**</b>   | <b>1.0</b>       | <b>0.8</b>       | <b>0.6</b>       | <b>1.3</b>         | <b>1.2</b>       |
| PTC14N                | 20285.6          | 5208.8           | 1795.1           | 117.4              | 187.3            |
| PTC14T                | 12297.9          | 1040.1           | 412.3            | 132.0              | 315.3            |
| <b>Fold (T/N)</b>     | <b>0.6</b>       | <b>0.2</b>       | <b>0.2</b>       | <b>1.1</b>         | <b>1.7</b>       |
| PTC26N                | 19600.1          | 5786.4           | 4448.3           | 109.8              | 204.5            |
| PTC26T                | 14779.2          | 2242.6           | 1660.6           | 106.9              | 194.4            |
| <b>Fold (T/N)</b>     | <b>0.8</b>       | <b>0.4</b>       | <b>0.4</b>       | <b>1.0</b>         | <b>1.0</b>       |
| PTC50N                | 17922.9          | 4769.0           | 1271.3           | 87.9               | 173.1            |
| PTC50T                | 16986.2          | 3913.0           | 1014.2           | 119.4              | 345.0            |
| <b>Fold (T/N)</b>     | <b>0.9</b>       | <b>0.8</b>       | <b>0.8</b>       | <b>1.4</b>         | <b>2.0</b>       |
| PTC67N                | 19730.9          | 7737.1           | 4043.7           | 91.9               | 169.9            |
| PTC67T                | 16362.2          | 2830.3           | 1595.5           | 86.5               | 265.2            |
| <b>Fold (T/N)</b>     | <b>0.8</b>       | <b>0.4</b>       | <b>0.4</b>       | <b>0.9</b>         | <b>1.6</b>       |
| PTC69N                | 19271.4          | 6447.0           | 3568.8           | 100.8              | 218.3            |
| PTC69T                | 11668.5          | 1621.6           | 914.2            | 151.2              | 397.5            |
| <b>Fold (T/N)</b>     | <b>0.6</b>       | <b>0.3</b>       | <b>0.3</b>       | <b>1.5</b>         | <b>1.8</b>       |
| PTC71N                | 17098.1          | 4594.9           | 1281.7           | 86.0               | 172.9            |
| PTC71T                | 13861.9          | 1572.0           | 391.9            | 108.0              | 211.6            |
| <b>Fold (T/N)</b>     | <b>0.8</b>       | <b>0.3</b>       | <b>0.3</b>       | <b>1.3</b>         | <b>1.2</b>       |
| PTC77N                | 18473.9          | 5801.6           | 4175.6           | 138.1              | 255.0            |
| PTC77T                | 15578.7          | 4824.9           | 3868.5           | 114.4              | 278.3            |
| <b>Fold (T/N)</b>     | <b>0.8</b>       | <b>0.8</b>       | <b>0.9</b>       | <b>0.8</b>         | <b>1.1</b>       |
| PTC86N                | 20147.1          | 12921.0          | 9442.1           | 78.5               | 126.9            |

|                   |            |            |            |            |            |
|-------------------|------------|------------|------------|------------|------------|
| PTC86T            | 19132.3    | 7108.6     | 4791.8     | 92.1       | 239.6      |
| <b>Fold (T/N)</b> | <b>0.9</b> | <b>0.6</b> | <b>0.5</b> | <b>1.2</b> | <b>1.9</b> |

---

\* Gene expression analyzed with Affymetrix U133 plus 2 chips in 9 PTC samples and indicated by RMA estimates and fold changes.

\*\* T: PTC tumor, N: adjacent unaffected thyroid tissue.

Gene expression data with Affymetrix chips were deposited in the National Center for Biotechnology Information Gene Expression Omnibus database (NCBI GEO accession no. GSE3467).
